# Supplementary material for: Arabidopsis response to low-phosphate conditions includes active changes in actin filaments and PIN2 polarization and is dependent on strigolactone signalling
Source: PubMed Central journal article supplement (PMC4339606; doi:10.1093/jxb/eru513), 2015-01-21

## Supplementary Data

### Arabidopsis Response to Low-Phosphate Conditions Includes Active Changes in Actin Filaments and PIN2 Polarization and Is Dependent on Strigolactone Signaling

Manoj Kumar,<sup>1†</sup> Nirali Pandya-Kumar,<sup>1†</sup> Anandamoy Dam,<sup>1</sup> Hila Haor,<sup>1</sup> Einav Mayzlish-Gati,<sup>1</sup> Eduard Belausov,<sup>1</sup> Smadar Wininger,<sup>1</sup> Mohamad Abu-Abied,<sup>1</sup> Christopher S. P. McErlean,<sup>2</sup> Liam J. Bromhead,<sup>2</sup> Cristina Prandi,<sup>3</sup> Yoram Kapulnik,<sup>1</sup> and Hinanit Koltai<sup>1,\*</sup>

#### Figure legends

**Figure S1.** PIN2 plasma-membrane localization and polarity in epidermal cells of the primary-root elongation zone in PIN2::PIN2–GFP seedlings grown under high (2 mM) and low (1  $\mu$ M) phosphate (Pi) conditions (120 h postgermination).

(A–D) PIN2–GFP signal in roots of Col-0 (A, B) and *max2-1* (*max2-1-22*; C, D) seedlings grown on high-Pi plates (A, C) and low-Pi plates (B, D) (scale bars = 50  $\mu$ m).

(E) Intensity of the PIN2–GFP signal in the apical plasma membrane of Col-0 and *max2-1-22* roots grown on high-Pi plates (white columns) and low-Pi plates (black columns).

(F) Polarity of the PIN2–GFP signal in the plasma membrane of Col-0 and *max2-1-22* roots grown on high-Pi plates (white columns) and low-Pi plates (black columns). Polarity index was determined as the ratio of intensity on the polar versus lateral sides, divided by 2 (Dhonukshe *et al.*, 2008).

Cells (n = 50–60) from 10 plants were examined per each of three replicates. Different lowercase letters above the bars indicate statistically significant differences between means by one-way ANOVA pairwise Student's t-test ( $P \leq 0.05$ ). Arrows point toward the roots.

**Figure S2.** AUX1 plasma-membrane localization in epidermal cells of the primary-root elongation zone in AUX1::AUX1–YFP seedlings grown under high (2 mM) and low (1  $\mu$ M) phosphate (Pi) conditions (48 h postgermination).

(A–B) AUX1–YFP signal in roots of Col-0 (A, B) seedlings grown on high-Pi plates (A) and low-Pi plates (B) (scale bars = 50  $\mu$ m).

(C) Intensity of the AUX1–YFP signal in the apical plasma membrane of Col-0 roots grown on high-Pi plates (white columns) and low-Pi plates (black columns).

Cells (n = 50–60) from 10 plants were examined per each of three replicates. Different lowercase letters above the bars indicate statistically significant differences between means by one-way ANOVA pairwise Student's t-test ( $P \leq 0.05$ ). Arrows point toward the roots.

**Figure S3.** Quantification of PIN2-containing BFA bodies in the epidermal cells of the primary-root elongation zone in PIN2::PIN2–GFP seedlings grown under high (2 mM) and low (1  $\mu$ M) phosphate (Pi) conditions (120 h postgermination)

(A–D) PIN2-containing BFA bodies (green – PIN–GFP signal; red – FM4-64) in Col-0 (A, B) and *max2-1-22* (C, D) roots grown on high-Pi plates (A, C) and low-Pi plates (B, D) and treated with BFA (100  $\mu$ M, 1 h) (scale bars = 50  $\mu$ m).

(E) Number of PIN2-containing BFA bodies per cell in the apical plasma membrane of Col-0 and *max2-1-22* roots grown on high-Pi plates (white columns) and low-Pi plates (black columns) and treated with BFA (100  $\mu$ M, 1 h).

(F) Percentage of cells with PIN2-containing BFA bodies in the apical plasma membrane of Col-0 and *max2-1-22* roots grown on high-Pi plates (white columns) and low-Pi plates (black columns) and treated with BFA (100  $\mu$ M, 1 h).

Cells (n = 50–60) from 10 plants were examined per each of three replicates. Different lowercase letters above the bars indicate statistically significant differences between means by one-way ANOVA pairwise Student's t-test ( $P \leq 0.05$ ). Arrows indicate PIN2-containing BFA bodies.

**Figure S1.**

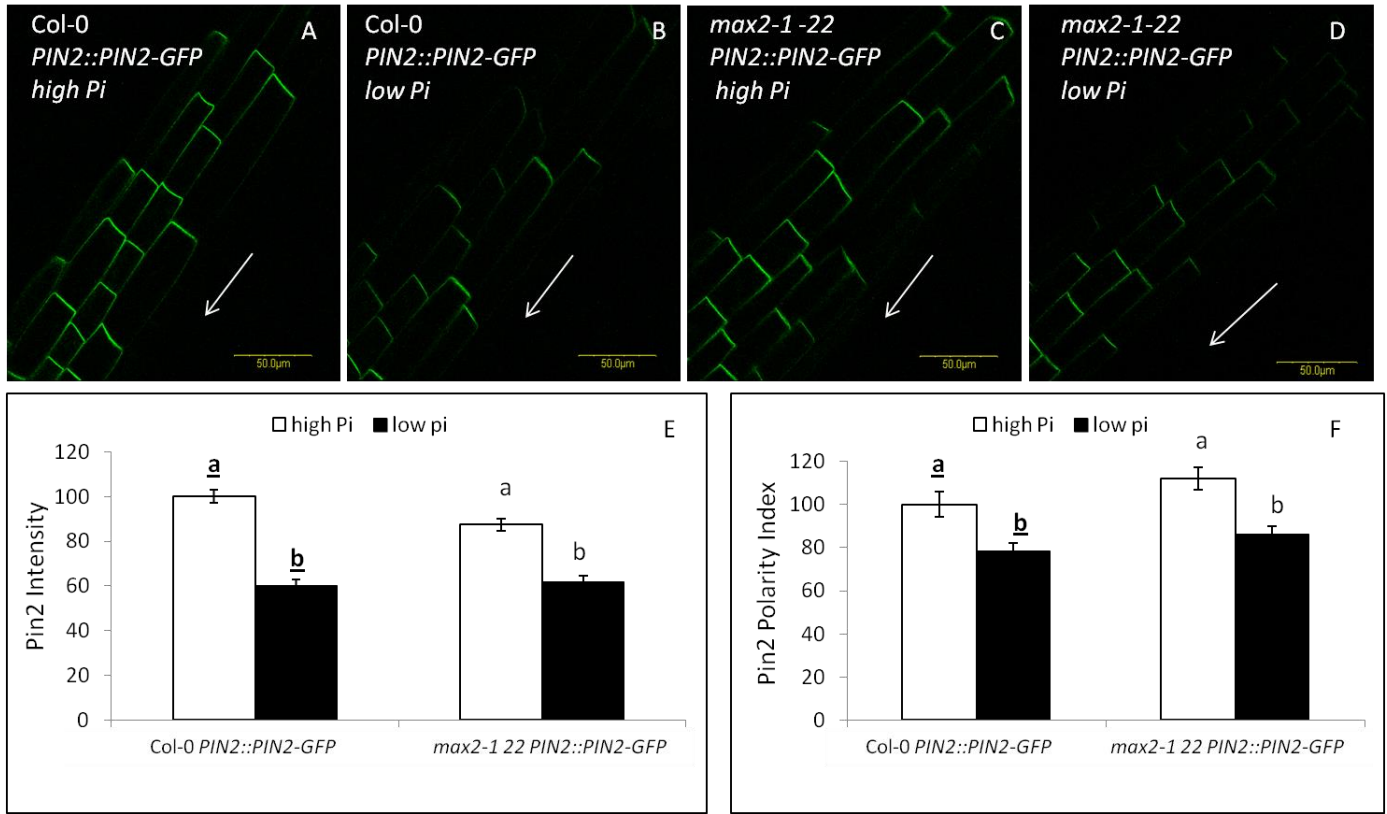

Figure S2.

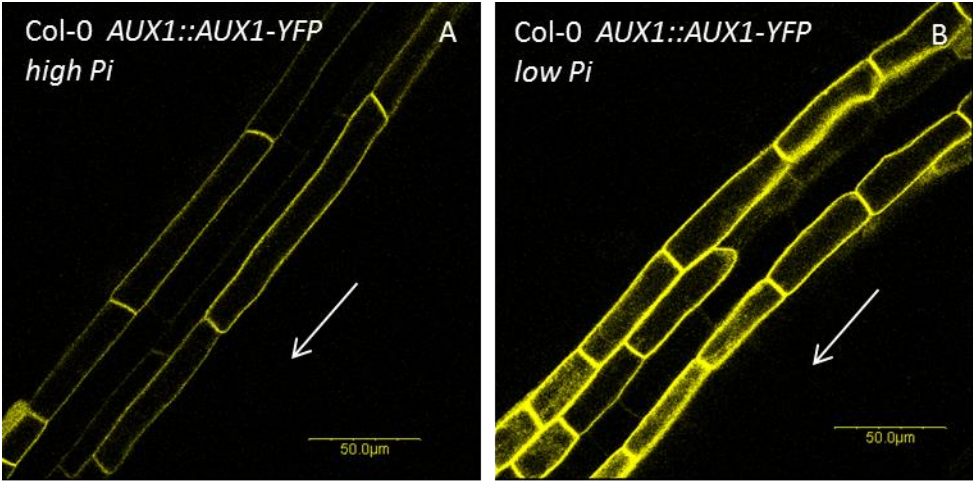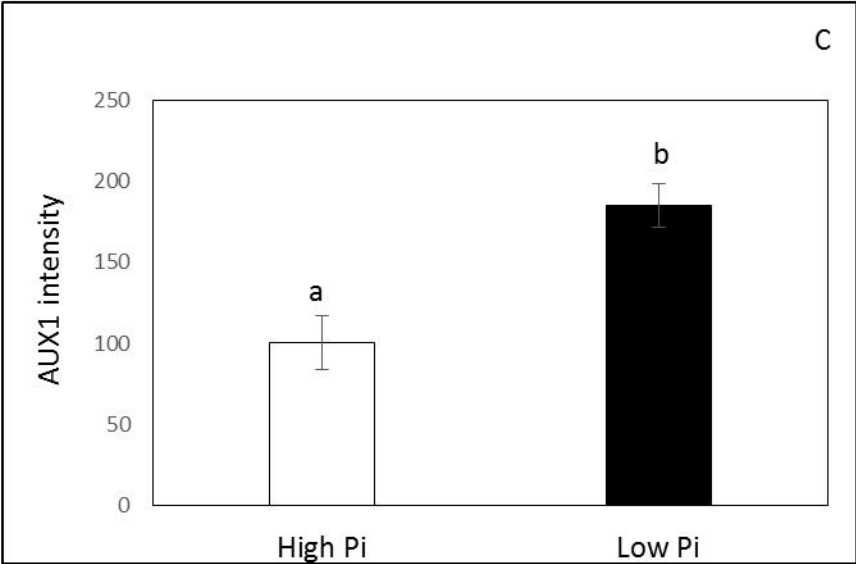

**Figure S3.**

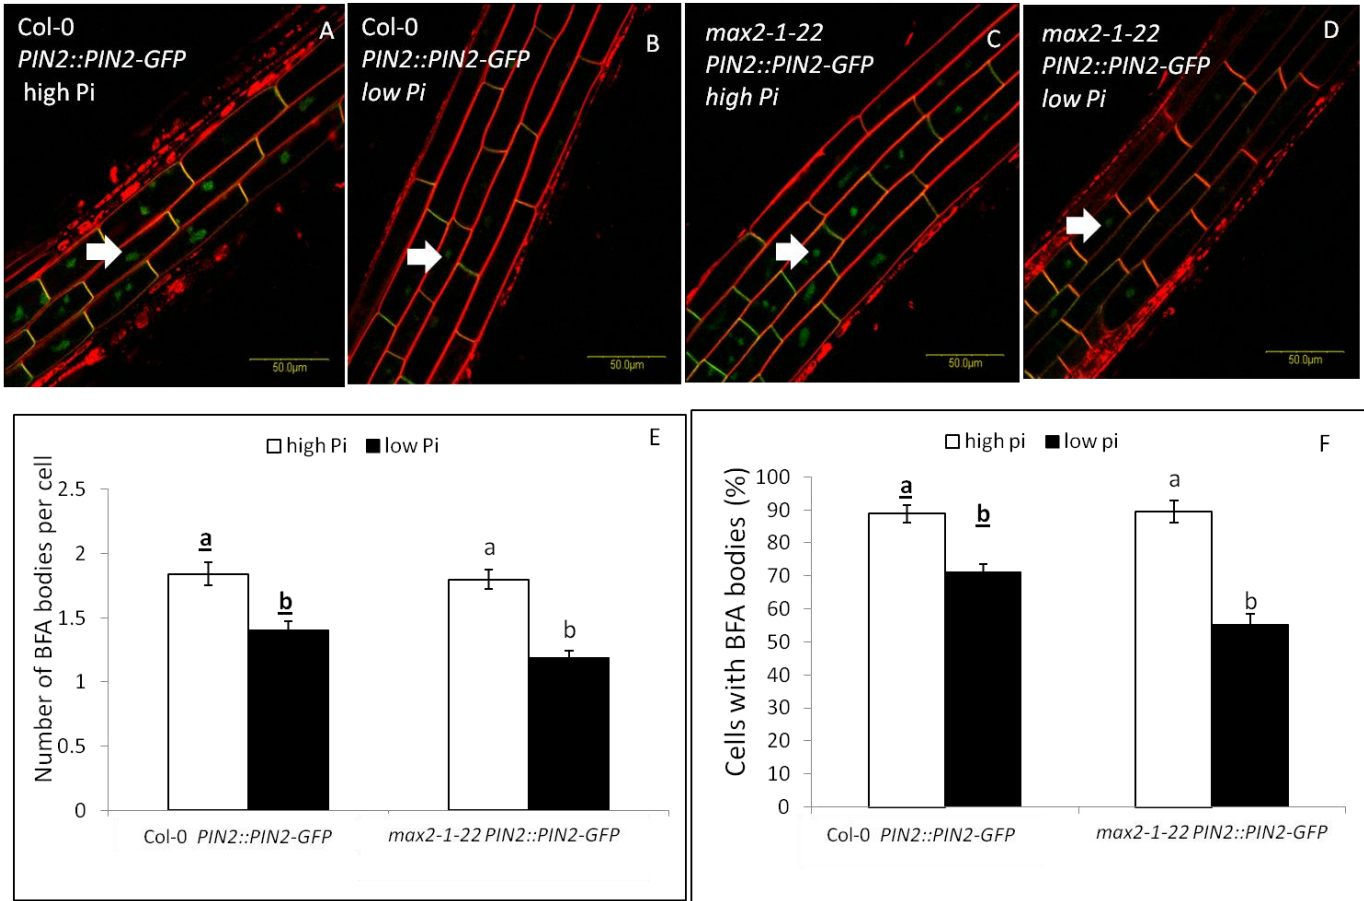

Supplement: supp_eru513_jexbot137166_file001.pdf [file supp_eru513_jexbot137166_file001.pdf]
